# Supplementary material for: Rapid Discrimination of Methicillin-Resistant Staphylococcus aureus by MALDI-TOF MS
Source: MDPI journal article supplement (doi:10.3390/pathogens8040214), 2019-11-01
Supplement: s1 [file s1]

1

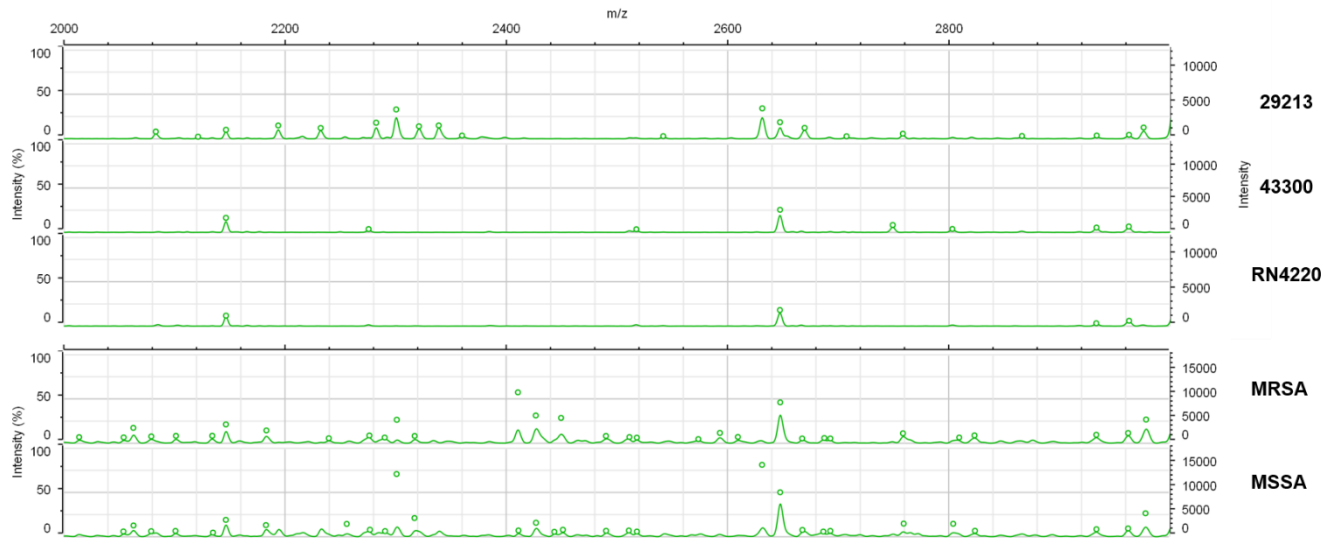

2

3

4

**Supplementary Figure S1.** Spectra and peak table of ATCC strains. The spectra showed m/z 2000 ~ 4000 range to easily reveal differences in each strain.

5

6 **Supplementary Table S1.** Specific peak of ATCC strains.

|            | 1975 | 2194 | 2339 | 2410 | 2592 | 2631 | 3890 | 4607 | 5053 | 5541 | 6594 | R peak | S peak | Result    |
|------------|------|------|------|------|------|------|------|------|------|------|------|--------|--------|-----------|
| ATCC 29213 |      | O    | O    |      |      | O    | O    |      | O    |      | O    | 2      | 3      | grey zone |
| ATCC 43300 |      |      |      |      |      |      |      |      | O    | O    |      | 0      | 0      | no peak   |
| RN4220     |      |      |      |      |      |      |      |      | O    |      |      | 0      | 0      | no peak   |

7 The peak table shows the specific peaks of different strains; O: expressed peak.
